# Supplementary material for: Nanochannel-based sensor for the detection of lead ions in traditional Chinese medicine
Source: PubMed Central journal article supplement — RSC Adv. 2021 Jan 19;11(6):3751–8. doi: 10.1039/d0ra10157e (PMC8694145; doi:10.1039/d0ra10157e), 2021-01-19
Supplement: RA-011-D0RA10157E-s001.pdf [file RA-011-D0RA10157E-s001.pdf]

## Supporting information

### **Nanochannel based sensor for the detection of lead ions in traditional Chinese medicine**

**Jiyuan Tu**<sup>a,b</sup>, **Zhongshi Zhou**<sup>a</sup>, **Yanju Liu**<sup>a,b</sup>, **Tingxian Li**<sup>a</sup>, **Shumin Lu**<sup>c</sup>,  
**Ling Xiao**<sup>a</sup>, **Pingping Xiao**<sup>c</sup>, **Guojun Zhang**<sup>\*c</sup>, **Zhongyue Sun**<sup>\*c</sup>

<sup>a</sup> School of Pharmacy, Hubei University of Chinese Medicine, 1 Huangjia Lake West Road, Wuhan 430065, P.R. China

<sup>b</sup> Hubei Research Center of Chinese Materia Medica Processing Engineering and Technology, Hubei University of Chinese Medicine, 1 Huangjia Lake West Road, Wuhan 430065, P.R. China

<sup>c</sup> School of Laboratory Medicine, Hubei University of Chinese Medicine, 1 Huangjia Lake West Road, Wuhan 430065, P.R. China

**\*Correspondence:** Guojun Zhang, School of Laboratory Medicine, Hubei University of Chinese Medicine, 1 Huangjia Lake West Road, Wuhan 430065, P.R. China.

E-mail: [zhanggj@hbtcu.edu.cn](mailto:zhanggj@hbtcu.edu.cn) ; Tel: +86-27-68890259, Fax: +86-27-68890259, and

Zhongyue Sun School of Laboratory Medicine, Hubei University of Chinese Medicine,  
1 Huangjia Lake West Road, Wuhan 430065, P.R. China ; E-mail:  
[shui10123@aliyun.com](mailto:shui10123@aliyun.com) Tel: +86-27-68890259

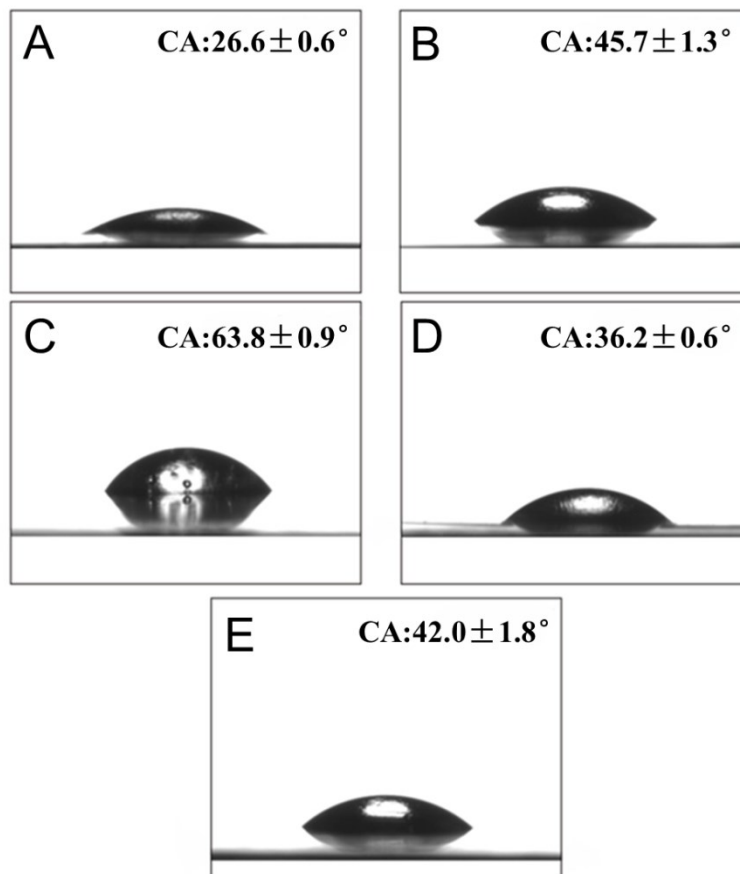

**Fig. S1.** Contact angle characterizations of the PAAM: bare (A), APTES and GA modification (B and C respectively), peptide-modification (D) and  $\text{Pb}^{2+}$  binding (E).

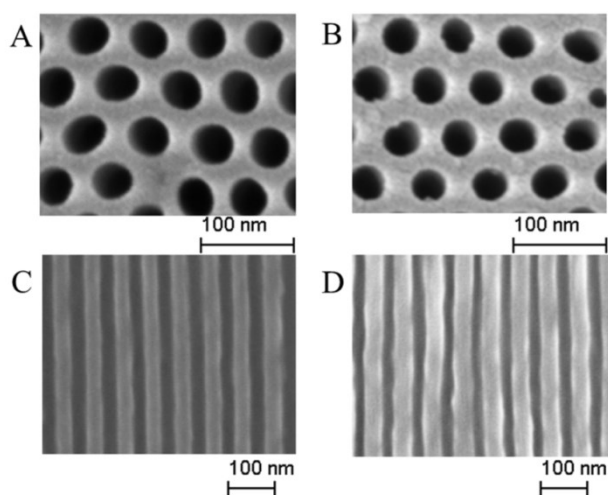

**Fig.S2.** SEM images of PAAM (A and B from vertical view, C and D from sectional view). Bare (A and C), peptide-modified PAAM (B and D).

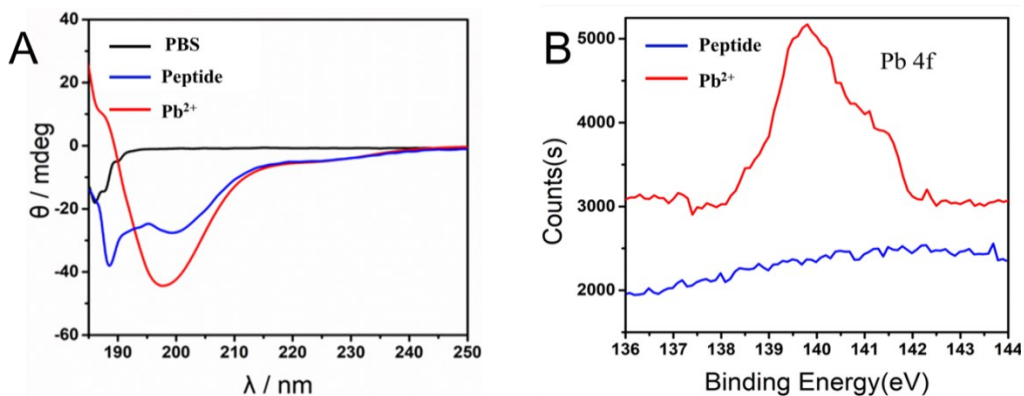

Fig. S3. (A) The CD spectra of PBS (black), peptide (blue), and peptide in the presence of  $Pb^{2+}$  (red). The concentrations of peptide and ions were 50 and 100  $\mu M$ , respectively. (B) Narrow survey of lead element XPS analysis of peptide (blue) and peptide in the presence of  $Pb^{2+}$  (red).

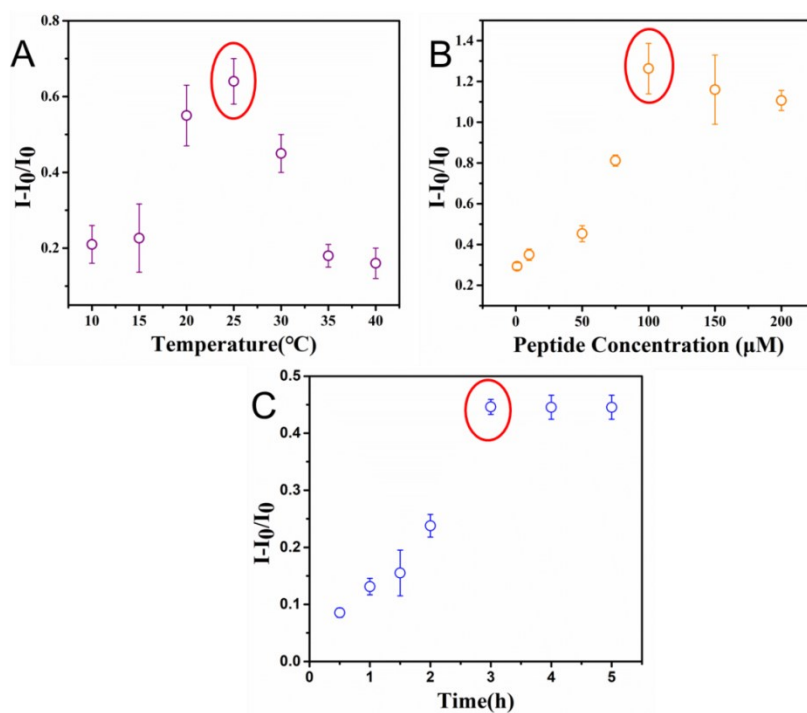

Fig. S4. The optimization of (A) modification temperature, (B) peptide concentration, (C) modification time. The assays were all carried out in the modification buffer (5 mM Tris-HCl, 100 mM KCl).  $I_0$  and  $I$  were measured at -1 V.

**Table S1. Comparison of analytical performance for peptide modified  
nanochannelsensors**

| <b>Materials (Methods)</b>                                                      | <b>LOD</b>   | <b>Reference</b> |
|---------------------------------------------------------------------------------|--------------|------------------|
| Multiwalled carbon nanotubes                                                    | 0.02 $\mu$ M | 1                |
| EDTA PANI/SWCNTs                                                                | 1.65 $\mu$ M | 2                |
| Nanocomposite modified<br>electrode                                             |              |                  |
| Doped carbon dots                                                               | 9.64 $\mu$ M | 3                |
| Fluorescence probe                                                              | 50nM         | 4                |
| Carbon dots fluorescence sensor                                                 | 2.2 $\mu$ M  | 5                |
| Fluorescence sensor based on<br>Graphene quantum dots and gold<br>Nanoparticles | 16.7 nM      | 6                |
| Porous Ce-Zr oxide nanospheres                                                  | 6 nM         | 7                |
| Interlocked hexagonal                                                           | 25 nM        | 8                |
| Peptide-modified nanochannel<br>sensor                                          | 5 nM         | This work        |

1. M. Sebastian and B. Mathew, *Journal of Materials Science*, 2018, **53**, 3557-3572.
2. M. A. Deshmukh, R. Celiesiute, A. Ramanaviciene, M. D. Shirsat and A. Ramanavicius, *Electrochimica Acta*, 2018, **259**, 930-938.
3. R. Bandi, R. Dadigala, B. R. Gangapuram and V. Guttena, *Journal of Photochemistry and Photobiology B: Biology*, 2018, **178**, 330-338.
4. H. Lu, C. Yu and S. Xu, *Sensors and Actuators B: Chemical*, 2019, **288**, 691-698.
5. Y. Kim and J. Kim, *Optical Materials*, 2020, **99**, 109514.
6. X. Niu, Y. Zhong, R. Chen, F. Wang, Y. Liu and D. Luo, *Sensors and Actuators B: Chemical*, 2018, **255**, 1577-1581.
7. P.-H. Li, Y.-X. Li, S.-H. Chen, S.-S. Li, M. Jiang, Z. Guo, J.-H. Liu, X.-J. Huang and M. Yang, *Sensors and Actuators B: Chemical*, 2018, **257**, 1009-1020.
8. P. Singh, L. S. Mittal, K. Kumar, P. Sharma, G. Bhargava and S. Kumar, *Chemical Communications*, 2018, **54**, 9482-9485.
